# Supplementary material for: Comparative Genomic Analysis of slc39a12/ZIP12: Insight into a Zinc Transporter Required for Vertebrate Nervous System Development
Source: PubMed Central journal article supplement (PMC4222902; doi:10.1371/journal.pone.0111535), 2014-11-06
Supplement: pone.0111535.s003.pdf [file pone.0111535.s003.pdf]

|                     |            |             |            |            |            |            |            |            |            |           |
|---------------------|------------|-------------|------------|------------|------------|------------|------------|------------|------------|-----------|
| <b>Feral pig-2</b>  | GIHGFFLIEK | CFILLVSPSA  | EK-----    | -----      | -----      | -----S     | PEDSQAAEIP | RGS----MTA | PNRKCKTISL | LAIMILVGD |
| <b>Cow</b>          | GIHGFFLIEK | CFILLVSPGA  | KK-----    | -----      | -----      | -----G     | PEDAQAAEIP | IPS----VNT | PNRKCKTISL | LAIMILVGD |
| <b>Horse-1</b>      | GIHGFFLIEK | CFILLVSPGA  | KQGVSLVNGH | VGHSHHLALN | SELSDQSGRG | KSASTLPLKG | PEDSQAPEIH | IGS----MTA | SNRKCKTISL | LAVMILVGD |
| <b>Horse-2</b>      | GIHGFFLIEK | CFILLVSPGA  | KK-----    | -----      | -----      | -----G     | PEDSQAPEIH | IGS----MTA | SNRKCKTISL | LAVMILVGD |
| <b>Dog-1</b>        | GIHGFFLIEK | CFILLVSPNA  | EG-VSLVNGH | GGHSHHLVLN | SELSDQSGRG | KSASTLQLKS | PEDSQAAEIP | GGG----MTA | SNRKCKTISL | LAIMILVGD |
| <b>Dog-2</b>        | GIHGFFLIEK | CFILLVSPNA  | E-----     | -----      | -----      | -----KS    | PEDSQAAEIP | GGG----MTA | SNRKCKTISL | LAIMILVGD |
| <b>Elephant-1</b>   | GIHGFFLIEK | CFILLVSPNA  | KQDASLVNGH | VGHSHHFALD | SELSDQSGGG | QSTSTIQLKS | PEDSQAAEIP | IRR----KTA | FNRKCKTMSL | LAIMILVGD |
| <b>Elephant-2</b>   | GIHGFFLIEK | CFILLVSPNA  | K-----     | -----      | -----      | -----KS    | PEDSQAAEIP | IRR----KTA | FNRKCKTMSL | LAIMILVGD |
| <b>Opossum</b>      | GIHGFFLIEK | CFILLFSPNA  | KK-----    | -----      | -----      | -----G     | PEDSDTAIEP | IDS----LAA | SNRKRKAISL | LAIMILVGD |
| <b>Platypus</b>     | GIHGFFLIEK | CFVLLMPESD  | KR-----    | -----      | -----      | -----S     | PEDSEPVVRS | ADS----LTA | SKGKRKAIGR | LAIMVLLGD |
| <b>Chicken</b>      | GIHGFFLIEK | CFVLLVTPRE  | QR-----    | -----      | -----      | -----S     | PEDSESAEVP | PGN----KV  | ISTKNKRISL | LAIMVLVGD |
| <b>Anole lizard</b> | GIYGFLLIEK | GFVLFMPSPHE | HV-----    | -----      | -----      | -----S     | LAILMNTNIS | EAHYLSLFNK | LSFRCQGI   | LAIMILVGD |
| <b>Xenopus frog</b> | GIYGFLLIEK | LFFFLLVSSPK | QG-LSLMNGH | LTHSHDLPLD | AHLGDQSRKA | KSSSTIQLRS | PDDCEHSEVP | ETLP--VRPK | ARRKSKGISL | LAIMILVGD |
| <b>Tilapia</b>      | GIYSFFLIEK | LFSFLVPSHS  | HG-----    | ---HGGDLS  | LNCNGHSQRG | KSISTIQLGF | VDDLECTEMS | PEHAN--TRR | PSPHRQGVSL | LAVMIVVGD |
| <b>Consensus</b>    | **::***:** | * :::       | .          |            |            |            |            |            | : ::       | **:*::**. |

|                      |            |              |            |            |            |            |            |            |            |                     |
|----------------------|------------|--------------|------------|------------|------------|------------|------------|------------|------------|---------------------|
|                      | 610        | 620          | 630        | 640        | 650        | 660        | 670        | 680        | 690        | 700                 |
| <b>Human-1</b>       | LHNFADGLAI | GAAFSSSSS    | GVTITIAILC | HEIPHEMGDF | AVLLSSGSLM | KTAIMNMFIS | SLTAFMGLYI | GLSVSADPCV | QDWIFVTAG  | MFLYLSLVM           |
| <b>Human-2</b>       | LHNFADGLAI | GAAFSSSSS    | GVTITIAILC | HEIPHEMGDF | AVLLSSGSLM | KTAIMNMFIS | SLTAFMGLYI | GLSVSADPCV | QDWIFVTAG  | MFLYLSLVM           |
| <b>Chimpanzee-1</b>  | LHNFADGLAI | GAAFSSSSS    | GVTITIAILC | HEIPHEMGDF | AVLLSSGSLM | KTAIMNMFIS | SLTAFMGLYI | GLSVSADPCV | QDWIFVTAG  | MFLYLSLVM           |
| <b>Chimpanzee-2</b>  | LHNFADGLAI | GAAFSSSSS    | GVTITIAILC | HEIPHEMGDF | AVLLSSGSLM | KTAIMNMFIS | SLTAFMGLYI | GLSVSADPCV | QDWIFVTAG  | MFLYLSLVM           |
| <b>Rhesus monkey</b> | LHNFADGLAI | GAAFSSSSS    | GVTITIAILC | HEIPHEMGDF | AVLLSSGSLM | KTAIMNMFIS | SLTAFMGLYI | GLSVSADPCV | QDWIFVTAG  | MFLYLSLVM           |
| <b>Galango-1</b>     | LHNFADGLVI | GAAFSSSSS    | GVTITIAILC | HEIPHEMGDF | AVLLSSGSLV | KTAIMNMFIS | ALTAFIGLYI | GLSVSADPGV | QDWIFVTAG  | MFLYLSLVM           |
| <b>Galango-2</b>     | LHNFADGLVI | GAAFSSSSS    | GVTITIAILC | HEIPHEMGDF | AVLLSSGSLV | KTAIMNMFIS | ALTAFIGLYI | GLSVSADPGV | QDWIFVTAG  | MFLYLSLVM           |
| <b>Rabbit-1</b>      | LHNFADGLVI | GAAFSSSSC    | GVTITIAILC | HEIPHEMGDF | AVLLSSGLPV | KTAIMNMFIS | ALTAFIGLYI | GLSVSADPCV | QDWILTBTAG | MFLYLSLVM           |
| <b>Rabbit-2</b>      | LHNFADGLVI | GAAFSSSSC    | GVTITIAILC | HEIPHEMGDF | AVLLSSGLPV | KTAIMNMFIS | ALTAFIGLYI | GLSVSADPCV | QDWILTBTAG | MFLYLSLVM           |
| <b>Guinea pig-1</b>  | LHNFADGLV  | GAAFSSSSS    | GVTITIAILC | HEIPHEMGDF | AVLLSSGSLV | KTAIMNMFIS | ALTAFIGLYI | GLSVSADPCV | QDWILTBTAG | MFLYLSLVM           |
| <b>Guinea pig-2</b>  | LHNFADGLV  | GAAFSSSSS    | GVTITIAILC | HEIPHEMGDF | AVLLSSGSLV | KTAIMNMFIS | ALTAFIGLYI | GLSVSADPCV | QDWILTBTAG | MFLYLSLVM           |
| <b>Mouse</b>         | LHNFADGLVI | GTAFFSSSLES  | GVTITIAILC | HEIPHEMGDF | AVLLSSGSLV | RTAIMNMFIS | ALTAFIGLYI | GLSVSADPCV | QDWILTBTAG | MFLYLSLVM           |
| <b>Rat</b>           | LHNFADGLVI | GTAFFSSSLES  | GVTITIAILC | HEIPHEMGDF | AVLLSSGSLI | RTAIMNMFIS | ALTAFIGLYI | GLSVSADPCV | QDWILTBTAG | MFLYLSLVM           |
| <b>Feral pig-1</b>   | LHNFADGLVI | GAAFSSSSS    | GVTITIAILC | HEIPHEMGDF | AVLLSSGLPI | KIAILVNFIS | ALTAFIGLYI | GLAVSTDPIC | QNWILTBTAG | MFLYLSLVM           |
| <b>Feral pig-2</b>   | LHNFADGLVI | GAAFSSSSS    | GVTITIAILC | HEIPHEMGDF | AVLLSSGLPI | KIAILVNFIS | ALTAFIGLYI | GLAVSTDPIC | QNWILTBTAG | MFLYLSLVM           |
| <b>Cow</b>           | LHNFADGLVI | GAAFSSSSEA   | GVTITIAILC | HEIPHEMGDF | AVLLSSGLPV | KIAILVNFIS | ALTAFIGLYI | GLSVSTDPIC | QNWILTBTAG | MFLYLSLVM           |
| <b>Horse-1</b>       | LHNFADGLVI | GAAFSSSSS    | GVTITIAILC | HEIPHEMGDF | AVLLSSGLPV | KIAILVNFIS | ALTAFIGLYI | GLSVSTDPIC | QNWILTBTAG | MFLYLSLVM           |
| <b>Horse-2</b>       | LHNFADGLVI | GAAFSSSSS    | GVTITIAILC | HEIPHEMGDF | AVLLSSGLPV | KIAILVNFIS | ALTAFIGLYI | GLSVSTDPIC | QNWILTBTAG | MFLYLSLVM           |
| <b>Dog-1</b>         | LHNFADGLVI | GAAFSSSSS    | GATTTLAALC | HEIPHEMGDF | AVLLSSGLPI | KIAILVNFIS | ALTAFIGLYV | GLSVSTDPIC | QNWILTBTAG | MFLYLSLVM           |
| <b>Dog-2</b>         | LHNFADGLVI | GAAFSSSSS    | GATTTLAALC | HEIPHEMGDF | AVLLSSGLPI | KIAILVNFIS | ALTAFIGLYV | GLSVSTDPIC | QNWILTBTAG | MFLYLSLVM           |
| <b>Elephant-1</b>    | LHNFADGLVI | GAAFSSSSS    | GITTTIAILC | HEIPHEMGDF | AVLLSSGLSV | KIAILVNFMS | ALTAFIGLYI | GLSVSTDPIC | QNWILTBTAG | MFLYLSLVM           |
| <b>Elephant-2</b>    | LHNFADGLVI | GAAFSSSSS    | GITTTIAILC | HEIPHEMGDF | AVLLSSGLSV | KIAILVNFMS | ALTAFIGLYI | GLSVSTDPIC | QNWILTBTAG | MFLYLSLVM           |
| <b>Opossum</b>       | LHNFADGLVI | GAAFSSSSTES  | GVTITIAILC | HEIPHEMGDF | AVLLSSGLAI | KTAIMNMFIS | ALTAFIGLYI | GLSVSTDPIC | QNWILTBTAG | MFLYLSLVM           |
| <b>Platypus</b>      | LHNFADGLVI | GAAFSSSSTET  | GVTITIAILC | HEIPHEMGDF | AVLLSTGLMT | KTAVLINFLS | ALPAFLGLYV | GLAISADPGV | QNWIFSBTAG | MFLYLSLVM           |
| <b>Chicken</b>       | LHNFADGLVI | GAAFSSSSTET  | GVTITIAILC | HEIPHEMGDF | AVLLSTGLPT | KIAILVNFMS | ALPAFLGLYI | GLSVSTDPIC | QNWIFSBTAG | MFLYLSLVM           |
| <b>Anole lizard</b>  | LHNFADGLVI | GAAFSSSSTEM  | GATTTLAALC | HEIPHEMGDF | AVLLSTGLSS | KIAILVNFIS | ALTAFIGLYI | GLSISTDPIC | QNWIFSBTAG | MFLYLSLVM           |
| <b>Xenopus frog</b>  | LHNFADGMVI | GSAAFSSSSTET | GIATVAILC  | HEIPHEMGDF | AVLLNTGLSA | KIAFLMNFIS | ALTAFIGLYI | GLSLSANPDV | QIWIFAVTAG | MFLYLSLVM           |
| <b>Tilapia</b>       | LHNFADGLVI | GAAFSSSSSET  | GMATTVAALC | HEIPHEMGDF | AVLLSSGSLV | KTAVLINFLS | ALPAFLGLYI | GLFVSSBTEV | QWIFVBTAG  | MFLYLSLVM           |
| <b>Consensus</b>     | *****:.    | *:**.* *     | * :::****  | *****      | *****      | *****:     | : :::***:  | .*.* **:   | ** :::. :  | * **::*** : ***** * |

|                      |            |            |             |               |
|----------------------|------------|------------|-------------|---------------|
|                      | 710        | 720        | 730         | 740           |
| <b>Human-1</b>       | LPETHVQQTQ | RPWMMFLLQN | FGLILGWLSL  | LLLAIYEQNI KI |
| <b>Human-2</b>       | LPETHVQQTQ | RPWMMFLLQN | FGLILGWLSL  | LLLAIYEQNI KI |
| <b>Chimpanzee-1</b>  | LPETHVQQTQ | RPWMMFLLQN | FGLILGWLSL  | LLLAIYEQNI KI |
| <b>Chimpanzee-2</b>  | LPETHVQQTQ | RPWMMFLLQN | FGLILGWLSL  | LLLAIYEQNI KI |
| <b>Rhesus monkey</b> | LPETHVQQTQ | RPWMMFLLQN | FGLILGWLSL  | LLLAIYEQNI KI |
| <b>Galango-1</b>     | LPETHVQQTQ | RPWMMFLLQN | FGLTLGWLSL  | LLLAIYEQNI KI |
| <b>Galango-2</b>     | LPETHVQQTQ | RPWMMFLLQN | FGLTLGWLSL  | LLLAIYEQNI KI |
| <b>Rabbit-1</b>      | LPETHVQQTQ | RPWMMFLLQN | FGLTLGWLSL  | LLLAIYEQNI KI |
| <b>Rabbit-2</b>      | LPETHVQQTQ | RPWMMFLLQN | FGLTLGWLSL  | LLLAIYEQNI KI |
| <b>Guinea pig-1</b>  | LPETHVQQTQ | RPWMMFLLQN | FGLTLGWLSL  | LLLAIYEQNI KI |
| <b>Guinea pig-2</b>  | LPETHVQQTQ | RPWMMFLLQN | FGLTLGWLSL  | LLLAIYEQNI KI |
| <b>Mouse</b>         | LPETHVQQTQ | RPWMMFLLQN | VGLVLGWFSL  | LLLAVYEQNI KI |
| <b>Rat</b>           | LPETHVQQTQ | RPWMMFLLQN | VGLVLGWFSL  | LLLAVYEQNI KI |
| <b>Feral pig-1</b>   | LPETHVQQTQ | RPWMMFLLQN | FGLTLGWLSL  | LLLAIYEQNI KI |
| <b>Feral pig-2</b>   | LPETHVQQTQ | RPWMMFLLQN | FGLTLGWLSL  | LLLAIYEQNI KI |
| <b>Cow</b>           | LPETHVQQTQ | RPWMMFLLQN | FGLTLGWLSL  | LLLAIYEQNI KI |
| <b>Horse-1</b>       | LPETHVQQTQ | RPWMMFLLQN | FGLTLGWLSL  | LLLAIYEQNI KI |
| <b>Horse-2</b>       | LPETHVQQTQ | RPWMMFLLQN | FGLTLGWLSL  | LLLAIYEQNI KI |
| <b>Dog-1</b>         | LPETHVQQTQ | RPWMMFLLQN | FGLTLGWLSL  | LLLAIYEQNI KI |
| <b>Dog-2</b>         | LPETHVQQTQ | RPWMMFLLQN | FGLTLGWLSL  | LLLAIYEQNI KI |
| <b>Elephant-1</b>    | LPETHVQQTQ | RPWMMFLLQN | FGLTLGWLSL  | LLLAIYEQNI KI |
| <b>Elephant-2</b>    | LPETHVQQTQ | RPWMMFLLQN | FGLTLGWLSL  | LLLAIYEQNI KI |
| <b>Opossum</b>       | LPETHVQQTQ | RPWMMFLLQN | FGLTLGWLSL  | LLLAIYEQNI KI |
| <b>Platypus</b>      | LPETHVQQTQ | RPWMMFLLQN | FGLTLGWLSL  | LLLAIYEQNI KI |
| <b>Chicken</b>       | LPETHVQQTQ | RPWMMFLLQN | LGLLLGWLCL  | LLLAIYEQKI KI |
| <b>Anole lizard</b>  | LPETHVQQTQ | RPWMMFLLQN | LGLLLGWLCL  | LLLAIYEPKI KI |
| <b>Xenopus frog</b>  | LPETHVQQTQ | RPWMMFLLQN | LGLLLGWLCL  | LLLAIYEHKI QF |
| <b>Tilapia</b>       | LPETHVQQTQ | RPWMMFLLQN | LGLLLGWAACL | LLLALFEHEL KF |
| <b>Consensus</b>     | **** ::::  | ** :*:**   | .* ** ** *  | ***:** : :    |
